# Supplementary material for: Manipulating electrochemical performance through doping beyond the solubility limit
Source: Royal Society of Chemistry journal article supplement (doi:10.1039/c6cp01003b), 2016-01-01
Supplement: c6cp01003b1.pdf [file c6cp01003b1.pdf]

## Supporting Information:

# Manipulating electrochemical performance through doping beyond the solubility limit

Natav Yatom<sup>1</sup>, and Maytal Caspary Toroker<sup>1,\*</sup>

<sup>1</sup>Department of Materials Science and Engineering, Technion - Israel Institute of Technology, Haifa 32000, Israel

This supporting information includes the total energies of the bulk in Table S1, the total energies and band positions relative to the vacuum of the surface slabs in Table S2, and afterwards are the unit cells with relaxed geometries.

**Table S1**-Total energy of the Pure hematite, 1.25at.%Nb doped hematite, and alloyed FeNbO<sub>4</sub> bulk calculations

| Stoichiometric unit                                       | Crystal type | Bravais lattice | Number of stoichiometric units in the cell | Total energy [eV] |
|-----------------------------------------------------------|--------------|-----------------|--------------------------------------------|-------------------|
| Fe <sub>2</sub> O <sub>3</sub>                            | Hematite     | Rhombohedral    | 2                                          | -68.154           |
| Nb <sub>x</sub> Fe <sub>2-x</sub> O <sub>3</sub> (x=1/32) | Hematite     | Rhombohedral    | 16                                         | -551.742          |
| FeNbO <sub>4</sub>                                        | Wolframite   | Monoclinic      | 2                                          | -96.795           |

**Table S2**- Calculated slabs: phase, number of atoms that converged the highest occupied state (h.o.s) to less than 1 meV/atom, Surface facet and terminated atom, top most atoms, energy levels of valance band maximum (VBM), (h.o.s), lowest unoccupied state (l.u.s) and conduction band minimum (CBM) with respect to the vacuum level and total energy.

| Phase                             | Number of atoms in the slab                                     | Facet/ Terminated atom | Top most atoms (R=bulk)                                            | VBM   | h.o.s | l.u.s | CBM   | Total energy [eV] |
|-----------------------------------|-----------------------------------------------------------------|------------------------|--------------------------------------------------------------------|-------|-------|-------|-------|-------------------|
| Nb-Fe <sub>2</sub> O <sub>3</sub> | Nb <sub>2</sub> Fe <sub>8</sub> O <sub>15</sub>                 | (0001)/Fe              | R-Fe-Fe-O <sub>3</sub> - <b>Nb</b>                                 | -5.59 | -4.04 | -3.37 | -3.37 | -179.896          |
| Nb-Fe <sub>2</sub> O <sub>3</sub> | Nb <sub>2</sub> Fe <sub>8</sub> O <sub>15</sub>                 | (0001)/Fe              | R-Fe- <b>Nb</b> -O <sub>3</sub> -Fe                                | -5.36 | -4.29 | -3.10 | -3.10 | -183.906          |
| Nb-Fe <sub>2</sub> O <sub>3</sub> | Nb <sub>2</sub> Fe <sub>8</sub> O <sub>15</sub>                 | (0001)/Fe              | R- <b>Nb</b> -Fe-O <sub>3</sub> -Fe                                | -5.84 | -4.94 | -3.53 | -3.53 | -183.818          |
| Fe <sub>2</sub> O <sub>3</sub>    | Fe <sub>10</sub> O <sub>15</sub>                                | (0001)/Fe              | R-Fe-Fe-O <sub>3</sub> -Fe                                         | -5.75 | -5.40 | -3.88 | -3.41 | -167.158          |
| Nb-Fe <sub>2</sub> O <sub>3</sub> | Nb <sub>2</sub> Fe <sub>10</sub> O <sub>21</sub>                | (0001)/O               | R-Fe- <b>Nb</b> -O <sub>3</sub>                                    | -8.14 | -7.92 | -7.49 | -5.85 | -235.384          |
| Nb-Fe <sub>2</sub> O <sub>3</sub> | Nb <sub>2</sub> Fe <sub>10</sub> O <sub>21</sub>                | (0001)/O               | R- <b>Nb</b> -Fe-O <sub>3</sub>                                    | -8.52 | -8.10 | -7.59 | -6.26 | -235.401          |
| Fe <sub>2</sub> O <sub>3</sub>    | Fe <sub>12</sub> O <sub>21</sub>                                | (0001)/O               | R-Fe-Fe-O <sub>3</sub>                                             | -8.77 | -8.46 | -6.59 | -6.59 | -213.092          |
| Nb-Fe <sub>2</sub> O <sub>3</sub> | Nb <sub>2</sub> Fe <sub>10</sub> O <sub>21</sub> H <sub>6</sub> | (0001)/OH              | R-Fe- <b>Nb</b> -(OH) <sub>3</sub>                                 | -4.76 | -3.81 | -2.66 | -2.44 | -262.540          |
| Nb-Fe <sub>2</sub> O <sub>3</sub> | Nb <sub>2</sub> Fe <sub>10</sub> O <sub>21</sub> H <sub>6</sub> | (0001)/OH              | R- <b>Nb</b> -Fe-(OH) <sub>3</sub>                                 | -4.82 | -3.82 | -2.71 | -2.44 | -263.136          |
| Fe <sub>2</sub> O <sub>3</sub>    | Fe <sub>12</sub> O <sub>21</sub> H <sub>6</sub>                 | (0001)/OH              | R-Fe-Fe-(OH) <sub>3</sub>                                          | -5.71 | -5.54 | -3.40 | -3.40 | -249.357          |
| Nb-Fe <sub>2</sub> O <sub>3</sub> | Nb <sub>2</sub> Fe <sub>10</sub> O <sub>18</sub>                | (01-12)/O              | R-Fe <sub>2</sub> -O <sub>2</sub> -Fe <b>Nb</b> -O <sub>2</sub>    | -5.56 | -4.75 | -3.45 | -3.45 | -215.381          |
| Nb-Fe <sub>2</sub> O <sub>3</sub> | Nb <sub>2</sub> Fe <sub>10</sub> O <sub>18</sub>                | (01-12)/O              | R-Fe <b>Nb</b> -O <sub>2</sub> -Fe <sub>2</sub> -O <sub>2</sub>    | -5.88 | -4.78 | -3.70 | -3.70 | -215.684          |
| Fe <sub>2</sub> O <sub>3</sub>    | Fe <sub>12</sub> O <sub>18</sub>                                | (01-12)/O              | R-Fe <sub>2</sub> -O <sub>2</sub> -Fe <sub>2</sub> -O <sub>2</sub> | -5.67 | -5.67 | -3.65 | -3.65 | -199.587          |
| FeNbO <sub>4</sub>                | Fe <sub>16</sub> Nb <sub>16</sub> O <sub>64</sub>               | (111)/O                | FeNbO <sub>4</sub>                                                 | -7.40 | -7.05 | -5.05 | -5.05 | -780.324          |

The geometries below are given according to the following order: title, lattice vectors in Cartesian coordinates, atom types, and numbers, respectively, and atom locations in fractional coordinates with respect to the lattice vectors. The atom coordinates are ordered according to the ordering given in the atom type row according to the format of the VASP simulation package.

**Bulk:**

Rhombohedral Pure Fe2O3

```

1.0
      5.4876980782      0.0000000000      0.0000000000
      3.1300017913      4.5075483638      0.0000000000
      3.1300000750      1.6371697833      4.1997217046
  O   Fe
  6   4
Direct
      0.749999642      0.444319755      0.055680726
      0.055680603      0.749999642      0.444319636
      0.444319308      0.055680610      0.749999821
      0.250000477      0.555680215      0.944319427
      0.944319367      0.250000358      0.555680335
      0.555680454      0.944319487      0.250000149
      0.854198754      0.854198813      0.854198635
      0.145801365      0.145801127      0.145801321
      0.645801544      0.645801425      0.645801306
      0.354198486      0.354198605      0.354198664

```

Monoclinic FeNbO4

```

1.0
      4.7112178802      0.0000000000      0.0000000000
      0.0000000000      5.7062559128      0.0000000000
      -0.0499085349      0.0000000000      5.0591853866
  O   Fe   Nb
  8   2   2
Direct
      0.229034200      0.115556479      0.917179048
      0.770965755      0.884443462      0.082820959
      0.770965755      0.115556479      0.582820952
      0.229034200      0.884443462      0.417179048
      0.275250643      0.385083616      0.421349347
      0.724749386      0.614916384      0.578650653
      0.724749386      0.385083616      0.078650653
      0.275250643      0.614916384      0.921349347
      0.000000000      0.168047935      0.250000000
      0.000000000      0.831952095      0.750000000
      0.500000000      0.683595717      0.250000000
      0.500000000      0.316404253      0.750000000

```

Rhombohedral 1.25at.%Nb doped Fe2O3

1.0

|               |              |              |
|---------------|--------------|--------------|
| 11.0010251999 | 0.0000000000 | 0.0000000000 |
| 6.2659172730  | 9.0533944357 | 0.0000000000 |
| 6.2740852551  | 3.2889036380 | 8.4329460178 |

O Fe Nb  
48 31 1

Direct

|             |             |             |
|-------------|-------------|-------------|
| 0.374579519 | 0.220758691 | 0.030272504 |
| 0.375738680 | 0.220860347 | 0.528864741 |
| 0.367139250 | 0.733437896 | 0.024597198 |
| 0.366249770 | 0.731074035 | 0.528235376 |
| 0.874323606 | 0.223659530 | 0.027420400 |
| 0.875059187 | 0.221578836 | 0.528752148 |
| 0.875081003 | 0.721886039 | 0.026826127 |
| 0.872807384 | 0.718269289 | 0.532112658 |
| 0.032041140 | 0.373799354 | 0.221382231 |
| 0.029922545 | 0.372959256 | 0.723157406 |
| 0.026695473 | 0.875578821 | 0.222843617 |
| 0.026454048 | 0.875892282 | 0.721760452 |
| 0.526663840 | 0.368907660 | 0.228938594 |
| 0.524785101 | 0.367356658 | 0.730721772 |
| 0.528094828 | 0.874508619 | 0.222535089 |
| 0.534168422 | 0.872226894 | 0.717176795 |
| 0.220524624 | 0.030436425 | 0.374832332 |
| 0.220916554 | 0.030531634 | 0.873668253 |
| 0.222110197 | 0.527747095 | 0.375970960 |
| 0.221951872 | 0.528181493 | 0.875080705 |
| 0.724469721 | 0.027394731 | 0.374521405 |
| 0.721747756 | 0.027745144 | 0.875586629 |
| 0.731137276 | 0.525270998 | 0.367836416 |
| 0.725956976 | 0.530195594 | 0.862939835 |
| 0.125443280 | 0.277603745 | 0.472054720 |
| 0.126378044 | 0.276836663 | 0.972227931 |
| 0.122108921 | 0.777779043 | 0.472999960 |
| 0.119990200 | 0.777987123 | 0.974827945 |
| 0.625083447 | 0.277955949 | 0.472946912 |
| 0.625667572 | 0.279211730 | 0.971801102 |
| 0.628920674 | 0.783957899 | 0.465818405 |
| 0.624224722 | 0.781498313 | 0.970307529 |
| 0.472087204 | 0.124098390 | 0.277472824 |
| 0.471836686 | 0.122454613 | 0.777962327 |
| 0.470305383 | 0.625594079 | 0.285642982 |
| 0.467786312 | 0.628247082 | 0.783413708 |
| 0.972366273 | 0.126235068 | 0.277040303 |
| 0.974687159 | 0.121194892 | 0.777816653 |
| 0.972450495 | 0.625776649 | 0.278488755 |
| 0.971153080 | 0.624227524 | 0.778314590 |
| 0.278416455 | 0.472851187 | 0.124527767 |
| 0.277731657 | 0.471844345 | 0.625296712 |
| 0.275845855 | 0.972995520 | 0.127199039 |
| 0.279025376 | 0.971978545 | 0.625656068 |
| 0.783246517 | 0.469815969 | 0.124209471 |
| 0.783681691 | 0.467210531 | 0.626165986 |

**Bulk:**

**Fe<sub>2</sub>O<sub>3</sub> (0001) Fe terminated surface**

Fe<sub>2</sub>O<sub>3</sub> (0001) R-Fe-Fe-O3-Nb

|                     |                    |                     |
|---------------------|--------------------|---------------------|
| 1.000000000000000   |                    |                     |
| 5.0980000496000004  | 0.000000000000000  | 0.000000000000000   |
| -2.5490000248000002 | 4.4149975513999999 | 0.000000000000000   |
| 0.000000000000000   | 0.000000000000000  | 25.6149997710999990 |
| O                   | Fe                 | Nb                  |
| 15                  | 8                  | 2                   |
| Direct              |                    |                     |
| 0.3141586190234662  | 0.0154648919936733 | 0.5003625286515216  |
| 0.9691403058435526  | 0.3276898375099009 | 0.6882964987810709  |
| 0.6410170458424389  | 0.6741982517103295 | 0.3145504594231383  |
| 0.0080997637321474  | 0.3213767056346697 | 0.5002612596158826  |
| 0.6642396115153844  | 0.6432896276643731 | 0.6862505962159702  |
| 0.3246981433987060  | 0.9769989865424904 | 0.3125323434695133  |
| 0.6978846022336924  | 0.7053628504117100 | 0.5002985844898689  |
| 0.3466776681031334  | 0.0152946082058705 | 0.6857750082539624  |
| 0.0121569075570420  | 0.3557719406259494 | 0.3146500278315685  |
| 0.3595716407046439  | 0.3482516251310557 | 0.4083221428603210  |
| 0.0175567961776864  | 0.6734714999210567 | 0.5900065624600686  |
| 0.6677448284104344  | 0.0256064487355445 | 0.4105856104645653  |
| 0.3406570402634870  | 0.3651787156435233 | 0.5922505012445427  |
| 0.9904403560541724  | 0.6602061715171175 | 0.4095774522479587  |
| 0.6524472806574622  | 0.9961599885916783 | 0.5911521086905225  |
| 0.0055648177488763  | 0.0142362411426120 | 0.5566781985365665  |
| 0.3387179083041971  | 0.6865768536910295 | 0.3735282056282898  |
| 0.6592040386662035  | 0.3312197764549794 | 0.3562271328904743  |
| 0.3405866371270392  | 0.6825416852750408 | 0.5344163157965696  |
| 0.0078836416359209  | 0.0134950162861003 | 0.4439330344901435  |
| 0.6789460301841004  | 0.3442154981096053 | 0.6272327413474983  |
| 0.6753861160460914  | 0.3482872981217326 | 0.4662043340748241  |
| 0.3223288356012972  | 0.6627725592781957 | 0.6442689917028375  |
| 0.9949372682691333  | 0.9958790923747287 | 0.7084484849492299  |
| 0.9935301298996819  | 0.0039379724270390 | 0.2922349398830946  |

Fe<sub>2</sub>O<sub>3</sub> (0001) R-Fe-Nb-O3-Fe

|                     |                    |                     |
|---------------------|--------------------|---------------------|
| 1.000000000000000   |                    |                     |
| 5.0980000496000004  | 0.000000000000000  | 0.000000000000000   |
| -2.5490000248000002 | 4.4149975513999999 | 0.000000000000000   |
| 0.000000000000000   | 0.000000000000000  | 25.6149997710999990 |
| O                   | Fe                 | Nb                  |
| 15                  | 8                  | 2                   |
| Direct              |                    |                     |
| 0.3077225254378106  | 0.0125493854437053 | 0.5000105593963156  |
| 0.9964757117249121  | 0.3626236577170516 | 0.6907174450892057  |
| 0.6421192137500285  | 0.6427625230936442 | 0.3142479300644823  |
| 0.0012995912281184  | 0.3199480202280753 | 0.5003041481468600  |
| 0.6380763790885666  | 0.6353321929156621 | 0.6830522655543234  |
| 0.3632305862865408  | 0.9971727981971839 | 0.3176739390275429  |
| 0.6949258387727610  | 0.7060738000811995 | 0.5006192748109299  |
| 0.3589572945856148  | 0.0023503239699636 | 0.6864152535822683  |
| 0.0051165174212073  | 0.3663351235184109 | 0.3098052630851740  |
| 0.3563895218154158  | 0.3328098927457432 | 0.4076689777081981  |
| 0.0456560520550653  | 0.6957653195904925 | 0.5920084024507943  |
| 0.6832801926185681  | 0.0537263639410668 | 0.4084375710340780  |
| 0.3187251427086792  | 0.3717736108990621 | 0.5922532729661967  |
| 0.9563161124401844  | 0.6509848484290544 | 0.4085632163232518  |
| 0.6458949145865063  | 0.9777700224850747 | 0.5930544371209550  |
| 0.9994240159642374  | 0.0131365464199789 | 0.5565892784163182  |
| 0.3260373563832317  | 0.6630682083384016 | 0.3694091775829378  |
| 0.9927978925993841  | 0.9952432070200885 | 0.7038559014181658  |
| 0.3360823300785469  | 0.6809719204029818 | 0.5337464884322216  |
| 0.0028104417148569  | 0.0144938533889274 | 0.4440361922967426  |
| 0.6757323269456990  | 0.3387053889361340 | 0.6311909376600653  |
| 0.0082434862570864  | 0.0020162472571883 | 0.2968198439867251  |
| 0.6664022056395069  | 0.3460446148687879 | 0.4668985090760671  |
| 0.6866350293232273  | 0.3451983803315954 | 0.3507178740482217  |
| 0.3152223375742480  | 0.6606287567805040 | 0.6499488867219512  |

Fe2O3 (0001) R-Nb-Fe-O3-Fe

1.0000000000000000  
5.0980000496000004 0.0000000000000000 0.0000000000000000  
-2.5490000248000002 4.4149975513999999 0.0000000000000000  
0.0000000000000000 0.0000000000000000 25.6149997710999990  
O Fe Nb  
15 8 2

Direct

0.3322334980046620 0.0168031392693422 0.4996982289809324  
0.9842185746310932 0.3529183747451228 0.6857875055004143  
0.6245460623651411 0.6547838970835400 0.3153375178828810  
0.0103316895469163 0.3386775426571589 0.5009310171935724  
0.6476113814041966 0.6305217391931990 0.6853146586376369  
0.3469477347465570 0.9914362128235013 0.3148687646727808  
0.6955102421781234 0.7020031936662434 0.5003302373121556  
0.3722358839935751 0.0167143531222038 0.6859142202523500  
0.0106685449630817 0.3794684847106637 0.3147302647051688  
0.3606422693591256 0.3624054645231709 0.4055014899186418  
0.0158955950120259 0.6441621280821366 0.5959411001224524  
0.6381721887236722 0.0230088073548274 0.4047085878340866  
0.3553451483245027 0.3667613559629359 0.5951607776088466  
0.9802988783733753 0.6361870237373353 0.4058976537177159  
0.6290940099786724 0.9863411971976319 0.5947430138835657  
0.0125952896062174 0.0073702959373065 0.5553424093979658  
0.0016816986803647 0.9998357366816677 0.7030223003227576  
0.6607211526221661 0.3412880095415858 0.3504825125719009  
0.3401288406178864 0.6855419902699253 0.5332274688918019  
0.0011050934356192 0.0192601148285547 0.4452810774959559  
0.9938737432656950 0.0089374605913122 0.2976181698845082  
0.6791329791824765 0.3467763210417445 0.4674122598671175  
0.3341239143555441 0.6667570675755883 0.6501903240647735  
0.3275203650988701 0.6759760615126851 0.3658662431665860  
0.6689382385304725 0.3335490348905665 0.6347372421134594

Fe2O3 (0001) R-Fe-Fe-O3-Fe

1.0000000000000000  
5.0980000496000004 0.0000000000000000 0.0000000000000000  
-2.5490000248000002 4.4149975513999999 0.0000000000000000  
0.0000000000000000 0.0000000000000000 25.6149997710999990  
O Fe  
15 10

Direct

0.3078642436629551 0.0075232518484185 0.5003329291123819  
0.9867159044941971 0.3529401817314692 0.6815096681913673  
0.6430296338873518 0.6622130216908175 0.3191505308103402  
0.0009548584136283 0.3143178314757691 0.5003190202094530  
0.6543399746595924 0.6483201649502917 0.6815309876168385  
0.3475936828413495 0.9944539012715197 0.3191073987841619  
0.6939957621455264 0.7005733732980488 0.5003134117002261  
0.3588966042925108 0.0206161221659897 0.6814981642277189  
0.0151705719829778 0.3666368076795692 0.3191381856736726  
0.3572317693744580 0.3405572596081754 0.4089237154669902  
0.0230088537350142 0.6742919253745825 0.5917116891499461  
0.6684966308283862 0.0304082879570444 0.4089350375231007  
0.3333451399187410 0.3631570373038073 0.5917131305705823  
0.9788736691207447 0.6519228579669090 0.4089357625578884  
0.6446538664891364 0.9846102502526932 0.5917226491300056  
0.0004571328238470 0.0073157017318266 0.5564544260687754  
0.3351025168888313 0.6743962889258128 0.3694204552776625  
0.9999055539832398 0.0072450345000874 0.6911931774802440  
0.6685263560815500 0.3410752049914763 0.3552417798110383  
0.3341222510742057 0.6740717983808793 0.5344650872940875  
0.0013875566225749 0.0075367638449038 0.4441876015311692  
0.6667932954303666 0.3406825472632278 0.6312221899488080  
0.0019707377399669 0.0078127491611113 0.3094301346075596  
0.6677454869890838 0.3408054127754312 0.4661813588540582  
0.3333910085197829 0.6740012818501242 0.6454064984019041

# Fe<sub>2</sub>O<sub>3</sub> (0001) O terminated surface

Fe2O3 (0001) R-Fe-Nb-O3

|                     |                    |                     |
|---------------------|--------------------|---------------------|
| 1.000000000000000   |                    |                     |
| 5.0980000496000004  | 0.000000000000000  | 0.000000000000000   |
| -2.5490000248000002 | 4.4149975513999999 | 0.000000000000000   |
| 0.000000000000000   | 0.000000000000000  | 25.6149997710999990 |

|    |    |    |
|----|----|----|
| O  | Fe | Nb |
| 21 | 10 | 2  |

Direct

|                    |                    |                    |
|--------------------|--------------------|--------------------|
| 0.3061755214913546 | 0.0051060330400077 | 0.5002691628224127 |
| 0.9781537120666570 | 0.3262676853457052 | 0.6807929740408198 |
| 0.6449845196022679 | 0.6841562477336112 | 0.3196592293762066 |
| 0.0012242164536218 | 0.3106359307198545 | 0.5003445487647724 |
| 0.6741543650348305 | 0.6430511564211940 | 0.6789749795391131 |
| 0.3278826807785080 | 0.9691628371942045 | 0.3217150754179343 |
| 0.6962032204559208 | 0.7000963723275788 | 0.5004298546885479 |
| 0.3570214672757643 | 0.0408618125074511 | 0.6810183576632625 |
| 0.0237667795805123 | 0.3483015357718529 | 0.3199146656569170 |
| 0.6696171975556169 | 0.9923261368784253 | 0.2314835429973741 |
| 0.7182342743166785 | 0.0301073179284401 | 0.7657157813188959 |
| 0.3654047011279999 | 0.3399239415218460 | 0.4099465018505839 |
| 0.0293200310215127 | 0.6710555771207822 | 0.5907911201866938 |
| 0.9993886162256658 | 0.7194178484213509 | 0.2368758592339049 |
| 0.0021891874883408 | 0.7218243959283228 | 0.7638309384981028 |
| 0.6693318599445846 | 0.0346696880803208 | 0.4109165661995959 |
| 0.3328958524057910 | 0.3667928440919965 | 0.5897826409327322 |
| 0.2832287584874322 | 0.3116297398862358 | 0.2349858999262509 |
| 0.3319246708394843 | 0.3244695759449954 | 0.7691754475445478 |
| 0.9729397965861111 | 0.6425650262299243 | 0.4099085281031805 |
| 0.6369108792831710 | 0.9760381748170914 | 0.5907395349140145 |
| 0.9989229310589067 | 0.0038559929491200 | 0.5570198177940711 |
| 0.3393250519739226 | 0.6771575113290140 | 0.3776353842006657 |
| 0.0075358963485144 | 0.0224241491291224 | 0.7227665999449684 |
| 0.6652154074215133 | 0.3385062120294364 | 0.3525491820509501 |
| 0.3335104425768947 | 0.6715370621775847 | 0.5341138481681398 |
| 0.0034076992487968 | 0.0058491720781291 | 0.4436702189904622 |
| 0.6628482597130940 | 0.3392924823582106 | 0.6230691970717714 |
| 0.9940200869887690 | 0.0148433088033073 | 0.2779220453546429 |
| 0.6688918133630892 | 0.3391368737946650 | 0.4665857236568201 |
| 0.3368214979528830 | 0.6749653290947037 | 0.6481407912991486 |
| 0.6709390597348133 | 0.3538430943494930 | 0.7414613991067469 |
| 0.3306245595969770 | 0.6828090339960227 | 0.2592325926857484 |

Fe2O3(0001) R-Nb-Fe-O3

1.0000000000000000

|                     |                    |                     |
|---------------------|--------------------|---------------------|
| 5.0980000496000004  | 0.0000000000000000 | 0.0000000000000000  |
| -2.5490000248000002 | 4.4149975513999999 | 0.0000000000000000  |
| 0.0000000000000000  | 0.0000000000000000 | 25.6149997710999990 |

|    |    |    |
|----|----|----|
| O  | Fe | Nb |
| 21 | 10 | 2  |

Direct

|                    |                    |                    |
|--------------------|--------------------|--------------------|
| 0.3075806534467347 | 0.0081222890275185 | 0.5004746471049302 |
| 0.9659926919698734 | 0.3357597923109381 | 0.6812178058863267 |
| 0.6544608188449956 | 0.6843269143283521 | 0.3218802725020709 |
| 0.0010533102788983 | 0.3114931205101357 | 0.5003449409796517 |
| 0.6772438577751672 | 0.6474505897156178 | 0.6815833912836098 |
| 0.3247561434984689 | 0.9706099700299120 | 0.3191158584851124 |
| 0.6945092852148989 | 0.7015581218821083 | 0.5002193634479042 |
| 0.3475295584856823 | 0.0314329336880661 | 0.6788122400255361 |
| 0.0359866452700786 | 0.3701496305935095 | 0.3194704882545878 |
| 0.6401486959938438 | 0.9655685535201073 | 0.2336995005412206 |
| 0.7093177378514923 | 0.0574667085867873 | 0.7676737195664316 |
| 0.3641998252168008 | 0.3393499220856810 | 0.4099074300097669 |
| 0.0248980219326924 | 0.6698731060382741 | 0.5899103320933961 |
| 0.0099557437698579 | 0.7012382108309154 | 0.2311299736489687 |
| 0.9919256243746375 | 0.6930135612408677 | 0.7695642459069418 |
| 0.6718028356433408 | 0.0397947683840627 | 0.4099013340938669 |
| 0.3302524866240546 | 0.3693250793712437 | 0.5907899872996296 |
| 0.2926147875059613 | 0.3482633204217791 | 0.2330259420907552 |
| 0.3616478103845893 | 0.3271540325856392 | 0.7669833606935512 |
| 0.9771608423358984 | 0.6457294920787433 | 0.4107870500492510 |
| 0.6378614875996931 | 0.9764866634299665 | 0.5907849456021239 |
| 0.9995783210160525 | 0.0058334168368646 | 0.5569313353342409 |
| 0.6838344706893551 | 0.3509903335289408 | 0.7323664851388685 |
| 0.3388198004639378 | 0.6765707216586492 | 0.3775168755798646 |
| 0.6677555687093601 | 0.3429574407550859 | 0.3527334451643256 |
| 0.3328571190614085 | 0.6729466325923141 | 0.5341944158810179 |
| 0.0025181975879178 | 0.0070741999187689 | 0.4437725261165042 |
| 0.6631992392968371 | 0.3391026701819655 | 0.6231825426733550 |
| 0.3181029274716423 | 0.6673565236072818 | 0.2683369921181296 |
| 0.6692764213492595 | 0.3410832986246390 | 0.4664903114287569 |
| 0.3342165574380616 | 0.6767169927098209 | 0.6479560600873242 |
| 0.0184163023472834 | 0.0130499932820598 | 0.7341691522661051 |
| 0.9835413735512333 | 0.9948310956433914 | 0.2665110386458736 |

Fe2O3(0001) R-Fe-Fe-O3

|                     |                    |                     |
|---------------------|--------------------|---------------------|
| 1.000000000000000   |                    |                     |
| 5.0980000496000004  | 0.000000000000000  | 0.000000000000000   |
| -2.5490000248000002 | 4.4149975513999999 | 0.000000000000000   |
| 0.000000000000000   | 0.000000000000000  | 25.6149997710999990 |

O Fe  
21 12

Direct

|                    |                    |                    |
|--------------------|--------------------|--------------------|
| 0.3071952666367039 | 0.0051824109801188 | 0.5002860422717887 |
| 0.9737103747308069 | 0.3311109568328021 | 0.6814026289965796 |
| 0.6441555594103505 | 0.6807090608844462 | 0.3191792548937897 |
| 0.0013900547754844 | 0.3105916576892582 | 0.5003439542889794 |
| 0.6705497747358464 | 0.6414221453594422 | 0.6797282201533790 |
| 0.3314207027937002 | 0.9711036172048253 | 0.3209352115820110 |
| 0.6955927246374785 | 0.6993653204577370 | 0.5004153312569528 |
| 0.3577112164075089 | 0.0382392710015651 | 0.6815226590176238 |
| 0.0281073050311207 | 0.3574365763117413 | 0.3193080996816136 |
| 0.6419374187867959 | 0.9422854582754567 | 0.2339295190766606 |
| 0.7381325378870542 | 0.0762365899468236 | 0.7654652303173322 |
| 0.3659586732460127 | 0.3395006433031753 | 0.4096578136215143 |
| 0.0274620077015442 | 0.6710682471069163 | 0.5909568813600785 |
| 0.0461886907040210 | 0.7373003978900030 | 0.2372458207108679 |
| 0.9549533479352661 | 0.6929174683953647 | 0.7634903400785618 |
| 0.6722767258558022 | 0.0363683190660709 | 0.4103710588360840 |
| 0.3301288239462323 | 0.3656295290436162 | 0.5903136428008580 |
| 0.2630504067209500 | 0.3375607451775124 | 0.2352164338870253 |
| 0.3593136857198047 | 0.3024969927225030 | 0.7667013874721960 |
| 0.9749843209909486 | 0.6445688546545085 | 0.4097442777576532 |
| 0.6365607167357297 | 0.9751068150243825 | 0.5910436228624008 |
| 0.9980746981333581 | 0.0034480892234257 | 0.5569653484767016 |
| 0.6726107801216443 | 0.3542774030603155 | 0.7334265163073539 |
| 0.3410300963740909 | 0.6778507298264103 | 0.3775011667770372 |
| 0.0053007913747365 | 0.0221092973829116 | 0.7231870893527557 |
| 0.6680411615947577 | 0.3410703981372478 | 0.3518115194226610 |
| 0.3332626733861801 | 0.6712526787395632 | 0.5344738525647301 |
| 0.0045037742741201 | 0.0064535909692935 | 0.4437315589351059 |
| 0.6612320957024522 | 0.3382938069447761 | 0.6231974521349812 |
| 0.3287231533462247 | 0.6812583179290215 | 0.2672501705291523 |
| 0.9960266736610990 | 0.0164862366620611 | 0.2775219855159321 |
| 0.6695056853650172 | 0.3392811707590226 | 0.4662282796086217 |
| 0.3339231852771150 | 0.6746972660377111 | 0.6488855834510119 |



# Fe<sub>2</sub>O<sub>3</sub> (0001) OH terminated surface

Fe2O3 (0001) R-Fe-Nb- (OH) 3

|                     |                    |                     |
|---------------------|--------------------|---------------------|
| 1.000000000000000   |                    |                     |
| 5.0980000496000004  | 0.000000000000000  | 0.000000000000000   |
| -2.5490000248000002 | 4.4149975513999999 | 0.000000000000000   |
| 0.000000000000000   | 0.000000000000000  | 25.6149997710999990 |

|    |    |   |    |
|----|----|---|----|
| O  | Fe | H | Nb |
| 21 | 10 | 6 | 2  |

Direct

|                    |                    |                    |
|--------------------|--------------------|--------------------|
| 0.3071915511007148 | 0.0169635493201241 | 0.5001890484864262 |
| 0.0064020678432186 | 0.3672691154168746 | 0.6879168171550347 |
| 0.6484676278847985 | 0.6653403773467303 | 0.3115082072877300 |
| 0.0006957679985362 | 0.3246950927478665 | 0.5003365398380879 |
| 0.6560543343713832 | 0.6500324863309430 | 0.6888491041101545 |
| 0.3460870788514256 | 0.9951401105019855 | 0.3118739360337983 |
| 0.6941782609953293 | 0.7104665792745877 | 0.5004988367032581 |
| 0.3542891489805697 | 0.0185501688393401 | 0.6890345075387785 |
| 0.9963584585005947 | 0.3623289439874213 | 0.3128863003781603 |
| 0.6746896288639661 | 0.0057181537296529 | 0.2223677607454988 |
| 0.6452416427556784 | 0.0035283365621765 | 0.7824460584962196 |
| 0.3538718731483428 | 0.3314955188246458 | 0.4077593177792878 |
| 0.0503093192852830 | 0.7053526470832168 | 0.5924432189628348 |
| 0.0407622946313069 | 0.7006034151793870 | 0.2168853463927860 |
| 0.9614419746896630 | 0.6609098616408886 | 0.7838390989570101 |
| 0.6795103739029997 | 0.0581440594564384 | 0.4091242298110132 |
| 0.3218092818392719 | 0.3793097769579958 | 0.5915384071487679 |
| 0.3568005256233917 | 0.3596434395571180 | 0.2181677702101439 |
| 0.3276377470588940 | 0.3312074645176892 | 0.7784047271803942 |
| 0.9509911304295784 | 0.6557406606986333 | 0.4082867169427615 |
| 0.6475529869456409 | 0.9783075323874968 | 0.5929013623683019 |
| 0.0042262730731650 | 0.0186730943155098 | 0.5569232146722740 |
| 0.3264209208405262 | 0.6817915184056673 | 0.3800658879472394 |
| 0.9821875915521261 | 0.0056620749161453 | 0.7316194697118092 |
| 0.6577412246651164 | 0.3399727315682384 | 0.3558851073710088 |
| 0.3346639864375192 | 0.6842655546312386 | 0.5339157402661883 |
| 0.9971993165570865 | 0.0151880695658804 | 0.4437490933275754 |
| 0.6750862847587698 | 0.3563550480896964 | 0.6206220249295455 |
| 0.0202495549164325 | 0.0249836163318591 | 0.2690193692915201 |
| 0.6667323597721335 | 0.3503109535920501 | 0.4667607424448548 |
| 0.3445194196126451 | 0.6830660620110081 | 0.6447835322422719 |
| 0.1466393519268721 | 0.8231722212809558 | 0.1865933302692895 |
| 0.5411630922914696 | 0.3429574314421018 | 0.2169436720197453 |
| 0.6936325092699533 | 0.9322078675573380 | 0.1883380263486174 |
| 0.8548268253872848 | 0.6776498560958046 | 0.8140185790285202 |
| 0.4606698749909341 | 0.8026711406108404 | 0.7837508366907926 |
| 0.3088662251240990 | 0.2374746162830803 | 0.8123062212108394 |
| 0.6767682641775110 | 0.3267066356033013 | 0.7309683422454469 |
| 0.3257179229457634 | 0.6513472443380905 | 0.2697184804560493 |

Fe2O3(0001) R-Nb-Fe-(OH)3

1.0000000000000000  
5.0980000496000004 0.0000000000000000 0.0000000000000000  
-2.5490000248000002 4.4149975513999999 0.0000000000000000  
0.0000000000000000 0.0000000000000000 25.6149997710999990

O Fe H Nb  
21 10 6 2

Direct

|                    |                    |                    |
|--------------------|--------------------|--------------------|
| 0.3058984130426552 | 0.0190162013229624 | 0.5003785497143411 |
| 0.9557748997980795 | 0.3121902860529389 | 0.6843330330749779 |
| 0.6669694674445878 | 0.6865982764515337 | 0.3156690934490385 |
| 0.9984504172783346 | 0.3246270836501637 | 0.5002881989566816 |
| 0.6806373948725906 | 0.6547942952161421 | 0.6852818848617375 |
| 0.3197292804925524 | 0.9660690666306238 | 0.3135879555854046 |
| 0.6904230631482520 | 0.7107078874700079 | 0.5002322835563078 |
| 0.3355020003623039 | 0.0251436139967467 | 0.6879897924641440 |
| 0.0428682202088808 | 0.3524989991303755 | 0.3149488639119085 |
| 0.7230978672690469 | 0.0444397549722453 | 0.2212031459135915 |
| 0.6706718512935979 | 0.9600917422130024 | 0.7806636438072800 |
| 0.3508844381823195 | 0.3480693920171021 | 0.4099537557861055 |
| 0.0185662363168859 | 0.6835223778739135 | 0.5897957028790017 |
| 0.0082141676927776 | 0.7049339612657377 | 0.2201759848543929 |
| 0.0000060987840556 | 0.6860077798027007 | 0.7793726586893825 |
| 0.6595151537423405 | 0.0314839501322695 | 0.4086010674231488 |
| 0.3359819817050322 | 0.3748540254510075 | 0.5920684782578078 |
| 0.3364275227293945 | 0.3119582403296945 | 0.2224585456126391 |
| 0.2918829918842789 | 0.3142571703400847 | 0.7786808133335086 |
| 0.9790422058974926 | 0.6587460623236865 | 0.4107928851586280 |
| 0.6448912785836072 | 0.0006638548858930 | 0.5904888918853928 |
| 0.0006619641923393 | 0.0218908628689718 | 0.5565726006988854 |
| 0.6638706872053177 | 0.3150881414337547 | 0.7448265424795011 |
| 0.3210475935371804 | 0.6705794613271365 | 0.3762712750271575 |
| 0.6737107185106552 | 0.3416737113646207 | 0.3544455685857528 |
| 0.3332497651915176 | 0.6871971441781142 | 0.5347494923589409 |
| 0.9956629958916778 | 0.0151601529699406 | 0.4440168105972759 |
| 0.6750116035707450 | 0.3541284508150966 | 0.6239267411265530 |
| 0.3588556880418565 | 0.6777301262977247 | 0.2554929819120915 |
| 0.6634457647120868 | 0.3509179439864738 | 0.4658071622175228 |
| 0.3230453328225380 | 0.6766406688072308 | 0.6463639762948930 |
| 0.0823768404626151 | 0.8247906344991520 | 0.1884656656501775 |
| 0.5299973935052193 | 0.3130135069076943 | 0.2212626627316894 |
| 0.7870420611943629 | 0.0668787122278474 | 0.1850720596626303 |
| 0.9222058604174421 | 0.7244848238425305 | 0.8114025629048029 |
| 0.4751701168916540 | 0.7689501894487094 | 0.7823758656738278 |
| 0.2308756778905590 | 0.2474101313820114 | 0.8143274325071701 |
| 0.9824434399544515 | 0.0007427509860136 | 0.7222264432899408 |
| 0.0035435112787283 | 0.0072541881281865 | 0.2786693971057375 |

Fe2O3(0001) R-Fe-Fe-(OH)3

1.0000000000000000  
4.4149975084930704 -2.5489999999999999 0.0000000000000000  
0.0000000000000000 5.0979999999999999 0.0000000000000000  
0.0000000000000000 0.0000000000000000 25.6149998092651003

O Fe H  
21 12 6

Selective dynamics

Direct

|                    |                    |                    |
|--------------------|--------------------|--------------------|
| 0.3061405007624529 | 0.0064594586372948 | 0.5002944104331988 |
| 0.9743215539803529 | 0.3417574879095469 | 0.6819595219668457 |
| 0.6461691147552600 | 0.6770317349376498 | 0.3188661661981058 |
| 0.0005745859835997 | 0.3114230620521354 | 0.5002923540903197 |
| 0.6684832292018470 | 0.6499305233573764 | 0.6815370087247388 |
| 0.3336997454566628 | 0.9814098532972864 | 0.3191876271378646 |
| 0.694946757431072  | 0.7008582323446291 | 0.5003117764819436 |
| 0.3563743542125835 | 0.0329349398997323 | 0.6817233903109994 |
| 0.0290520035772985 | 0.3681503625927292 | 0.3188327274529712 |
| 0.6815950054513564 | 0.0149440998126735 | 0.2310354788634967 |
| 0.6911409791861658 | 0.0147321323124459 | 0.7730709964977436 |
| 0.3633440955610538 | 0.3413390417621613 | 0.4097560912996485 |
| 0.0270682623683172 | 0.6723454934683701 | 0.5907369273814567 |
| 0.0099642088157523 | 0.7042622457824237 | 0.2276302459991655 |
| 0.9906058074211899 | 0.6970920921749553 | 0.7733353020567222 |
| 0.6685406115981678 | 0.0353331777028529 | 0.4097594736426942 |
| 0.3330167570441702 | 0.3679950089688333 | 0.5908338977400263 |
| 0.3110896889862360 | 0.3233142707992940 | 0.2275803830355301 |
| 0.3216984861759471 | 0.3324467346463962 | 0.7702190254481849 |
| 0.9743515624551691 | 0.6455822554165067 | 0.4098926414566577 |
| 0.6382945601066865 | 0.9793543814734846 | 0.5908740020401169 |
| 0.9995118532313967 | 0.0060353610209276 | 0.5570233059726348 |
| 0.6717991816457243 | 0.3397942010271962 | 0.7353972940281608 |
| 0.3357122287741277 | 0.6749971734211471 | 0.3762554486934206 |
| 0.9996087303856100 | 0.0087009295585503 | 0.7190140878992679 |
| 0.6685902384142963 | 0.3413727011066214 | 0.3528228723145688 |
| 0.3333737353270081 | 0.6727341195942955 | 0.5342171258625399 |
| 0.0017475140211474 | 0.0069012796751409 | 0.4435794420204644 |
| 0.6658406888279771 | 0.3407187347032803 | 0.6243590382056894 |
| 0.3315487805330477 | 0.6686096010220339 | 0.2651257859898877 |
| 0.0032703546196728 | 0.0094572778758462 | 0.2817505598997201 |
| 0.6676483060880898 | 0.3398171680008701 | 0.4663685297028763 |
| 0.3338891273822426 | 0.6748473440668192 | 0.6477968168678814 |
| 0.1007295448980230 | 0.8332375189758494 | 0.1971908707976766 |
| 0.5062031200879247 | 0.3272591581374940 | 0.2277528249215450 |
| 0.7360054284175916 | 0.9912524077760807 | 0.1957135534959420 |
| 0.8945098314894437 | 0.7340553085470489 | 0.8031680841326363 |
| 0.4954152742431788 | 0.8243479884515068 | 0.7731591392662907 |
| 0.2717760390105397 | 0.2423706567656367 | 0.8048162872173705 |

# Fe<sub>2</sub>O<sub>3</sub> (01-12) O terminated surface

```
Fe2O3 (0001) R-Fe2-O2-FeNb-O2
1.0000000000000000
 19.6922664641999994    0.0000000000000000    0.0000000000000000
  0.0000000000000000    5.0980000496000004    0.0000000000000000
  0.0000000000000000    0.0000000000000000    5.4933905601999999
 O      Fe      Nb
 18     10      2
Selective dynamics
Direct
0.8020749689911781 0.0835141769935177 0.8086015177610619
0.8665609350433101 0.6025486289452857 0.9466641177321264
0.0552524286212019 0.0962694649629441 0.3744426872641426
0.2494715403367067 0.6159138262846398 0.7981046397805187
0.2033028020646839 0.0573962843190259 0.6689933075224204
0.1322694173702672 0.6099275565782349 0.5476505234160243
0.9394004945370042 0.1032376579809693 0.1181850210623452
0.7387181707754564 0.5782724498591847 0.7110674765974423
0.1979296562857655 0.9165754258865206 0.1913975093930915
0.1334708448908160 0.3974493203494305 0.0532928461227229
0.9447717239030951 0.9037122116159750 0.6256129593667481
0.7504686145515436 0.3841162688381559 0.2019151891665132
0.7966647703519740 0.9425444667055345 0.3311221347824542
0.8676758660361585 0.3899196512624030 0.4522481944823795
0.0606219261845027 0.8967464783167287 0.8819776636060510
0.2612670158261992 0.4218543157447527 0.2889075378154971
0.9988316344487487 0.5612740041288617 0.2499656262961736
0.0012144197835013 0.4387196114550065 0.7499042653972552
0.8450934058384263 0.7636819397424475 0.6058340732395067
0.0403260958391343 0.2488770027873102 0.0303480757172352
0.1526156757374295 0.7486087456551331 0.9190433887708593
0.9639531239743135 0.2426661658592835 0.4692715419296789
0.7666733516390849 0.7437825335197488 0.0390282650930374
0.1549067790307674 0.2362301389704911 0.3941786732935029
0.9597051668230208 0.7511257922243857 0.9697012645652521
0.8474010817855486 0.2514525436460247 0.0809307626101088
0.0360466840106710 0.7573689654676130 0.5307483967023501
0.2333458108487889 0.2562860817967803 0.9609976778998899
0.2252071452499322 0.6930042178623808 0.4728625785075238
0.7747583982207686 0.3069240512412748 0.5270020651060463
```

Fe2O3(0001) R-FeNb-O2-Fe2-O2

|                     |                   |                   |
|---------------------|-------------------|-------------------|
| 1.000000000000000   |                   |                   |
| 19.6922664641999994 | 0.000000000000000 | 0.000000000000000 |
| 0.000000000000000   | 5.098000049600004 | 0.000000000000000 |
| 0.000000000000000   | 0.000000000000000 | 5.493391037000003 |

O Fe Nb  
18 10 2

Selective dynamics

Direct

|                    |                    |                    |
|--------------------|--------------------|--------------------|
| 0.8054590209317141 | 0.0587946622320104 | 0.7961264485458983 |
| 0.8679733117256134 | 0.6240882112272956 | 0.9521914758758072 |
| 0.0626654646426630 | 0.0999061818816571 | 0.3873136615068375 |
| 0.2506684483828039 | 0.6078571722905295 | 0.8022176626239172 |
| 0.1964015859034092 | 0.0869076996188554 | 0.6916031504027345 |
| 0.1285376826518458 | 0.5826198632859345 | 0.5358385459666692 |
| 0.9452590577282152 | 0.1033334840090347 | 0.1252510933065167 |
| 0.7511488070255723 | 0.6160210010864304 | 0.7060144974208029 |
| 0.1945395718156959 | 0.9412016375990291 | 0.2038761916167076 |
| 0.1320271984316364 | 0.3759112024052556 | 0.0478064325152801 |
| 0.9373341833614504 | 0.9000959005864146 | 0.6126919818054262 |
| 0.7493318354918728 | 0.3921479114980997 | 0.1977810940602325 |
| 0.8036009227706984 | 0.9130940449154323 | 0.3083954670869744 |
| 0.8714622960689411 | 0.4173784585261799 | 0.4641626587270622 |
| 0.0547410066878129 | 0.8966674909514296 | 0.8747559183325748 |
| 0.2488514586050457 | 0.3839759127961457 | 0.2939817937292304 |
| 0.0005304345466115 | 0.5610922911928498 | 0.2522104060612875 |
| 0.9994686055211162 | 0.4389101283905390 | 0.7477984182883759 |
| 0.0391748178517872 | 0.2467329432254033 | 0.0226853360468979 |
| 0.2331133785319750 | 0.7212800650747013 | 0.4754742529043625 |
| 0.1529492823981542 | 0.7613419013814422 | 0.9098997607562396 |
| 0.9611182265399734 | 0.2511010958975177 | 0.4645404890456390 |
| 0.7703582777395113 | 0.6984779605111271 | 0.0400233283468978 |
| 0.9608245606694794 | 0.7532682259436072 | 0.9773197274849466 |
| 0.7668856888279194 | 0.2787130168530609 | 0.5245231727579025 |
| 0.8470514330658361 | 0.2386614520404891 | 0.0900874917877701 |
| 0.0388815159967493 | 0.7489017737109762 | 0.5354685882791728 |
| 0.2296415471029007 | 0.3015261478651539 | 0.9599688148653200 |
| 0.8401713783570557 | 0.7562368677037057 | 0.5936223790927571 |
| 0.1598279376259342 | 0.2437542952997092 | 0.4063678667597799 |

Fe2O3(0001) R-Fe2-O2-Fe2-O2

|                     |                    |                     |
|---------------------|--------------------|---------------------|
| 1.000000000000000   |                    |                     |
| 19.6922656094624671 | 0.000000000000000  | -0.0000000000000020 |
| 0.000000000000000   | 5.0980000000000034 | 0.000000000000000   |
| 0.000000000000000   | 0.000000000000000  | 5.4933905052484668  |

O Fe  
18 12

Selective dynamics

Direct

|                    |                    |                    |
|--------------------|--------------------|--------------------|
| 0.8056726110587604 | 0.0631401289639939 | 0.8105898837574657 |
| 0.8695956757575587 | 0.6014626478502691 | 0.9531481260458747 |
| 0.0580100182666428 | 0.1027621472486402 | 0.3809523317294818 |
| 0.2449993277696549 | 0.5983037987626432 | 0.7974186750031720 |
| 0.1943294489891656 | 0.0631293423316990 | 0.6894054416382644 |
| 0.1304038819985607 | 0.6014550408873518 | 0.5468528319592281 |
| 0.9419904661680647 | 0.1027623801028668 | 0.1190464216616576 |
| 0.7550005291639224 | 0.5983115489123279 | 0.7025817943477861 |
| 0.1943280998180725 | 0.9368572075151604 | 0.1894097930894247 |
| 0.1304046254275377 | 0.3985333371173212 | 0.0468503258608237 |
| 0.9419902594532559 | 0.8972404657183688 | 0.6190476471562931 |
| 0.7550006613255960 | 0.4016870640716448 | 0.2025791128002865 |
| 0.8056712351019044 | 0.9368628056178991 | 0.3105896076417807 |
| 0.8695960491584955 | 0.3985432997147456 | 0.4531473314963961 |
| 0.0580101539114324 | 0.8972394516220987 | 0.8809538681896996 |
| 0.2449990865429612 | 0.4016881389933573 | 0.2974216428678176 |
| 0.0000006963724388 | 0.5604794494344603 | 0.2499990918712740 |
| 0.9999999727734945 | 0.4395249100516025 | 0.7500013107088250 |
| 0.8468227680272236 | 0.7630486420092808 | 0.5946971765423612 |
| 0.0384484840162287 | 0.2486457935458688 | 0.0297580176197698 |
| 0.2243449486169169 | 0.7114081066315805 | 0.4675203374597103 |
| 0.1531761462543386 | 0.7630358521548288 | 0.9053021474274558 |
| 0.9615512162776412 | 0.2486470151807865 | 0.4702403575640446 |
| 0.7756546471593992 | 0.7114075584778163 | 0.0324844159474722 |
| 0.1531751681764888 | 0.2369613647121369 | 0.4052991585935146 |
| 0.9615502475544773 | 0.7513543437852377 | 0.9702413361727977 |
| 0.7756549008089024 | 0.2885984397256607 | 0.5324824990781210 |
| 0.8468244751124345 | 0.2369655090131744 | 0.0946992697318976 |
| 0.0384480789243256 | 0.7513586894559907 | 0.5297622436299321 |
| 0.2243461200140828 | 0.2885855203911873 | 0.9675178024073929 |

# FeNbO<sub>4</sub> (111) O terminated surface

FeNbO4(111) R-Fe2Nb2-O3  
1.00000000000000  
6.6582457565451714 3.2287397729529732 -0.0000000000000020  
0.0000000000000000 6.9472070052878721 0.0000000000000000  
-0.00000000000000040 -0.00000000000000040 37.8345640978416498

O Fe Nb  
64 16 16  
Selective dynamics  
Direct

|                    |                    |                    |
|--------------------|--------------------|--------------------|
| 0.8794990214309664 | 0.7978190142764490 | 0.7070858908598865 |
| 0.1481922857704703 | 0.1582120428413916 | 0.7880183484059771 |
| 0.4191652190884980 | 0.4929513875769445 | 0.8659175735321298 |
| 0.9526108602774599 | 0.1745458813507312 | 0.0204590483819729 |
| 0.6866384836585482 | 0.8330357776309825 | 0.9429852993153460 |
| 0.2174136702101706 | 0.5171915685757824 | 0.0978985029059345 |
| 0.4848983350283405 | 0.8550239628984500 | 0.1751103884791760 |
| 0.7513916561057528 | 0.1911971783395288 | 0.2562027707420782 |
| 0.5721984170580185 | 0.2373946501335951 | 0.6990485704910938 |
| 0.8408396813996717 | 0.5798924290750733 | 0.7739015783097543 |
| 0.1055795287216910 | 0.9249410531634013 | 0.8511652820006219 |
| 0.3715783032897448 | 0.2642312988430078 | 0.9291328904632365 |
| 0.6369604612068045 | 0.6061041878445010 | 0.0065975688032580 |
| 0.9017962002203248 | 0.9484993791299701 | 0.0840000753550214 |
| 0.1689674420166014 | 0.2876815354958993 | 0.1617875203399706 |
| 0.4341123348478604 | 0.6259272900969393 | 0.2355881497194119 |
| 0.9523262744808463 | 0.2031537273822437 | 0.7217079127477319 |
| 0.2091583751892969 | 0.5559162521677266 | 0.8035157176531129 |
| 0.4765243321676849 | 0.8928742087417945 | 0.8816370070360975 |
| 0.7422199178186730 | 0.2347176080327884 | 0.9589678407930933 |
| 0.0071658155596950 | 0.5764927913104430 | 0.0365073209584921 |
| 0.2732654500698999 | 0.9184728121215144 | 0.1138063773915476 |
| 0.5395777812286369 | 0.2524809153778733 | 0.1921279102181401 |
| 0.8071197836809390 | 0.6026323843901480 | 0.2762729311810119 |
| 0.6068154996264070 | 0.5975115603186651 | 0.7063800549512962 |
| 0.8665366639793888 | 0.9587255246107986 | 0.7803767016772341 |
| 0.1328932468604833 | 0.3047164231672070 | 0.8595098429559442 |
| 0.3976629054756700 | 0.6450860321195151 | 0.9367830021685393 |
| 0.9305162822515385 | 0.3276887146899341 | 0.0919130327111546 |
| 0.6637388289588415 | 0.9865945002401304 | 0.0143708785013317 |
| 0.1966214027405613 | 0.6666499108800679 | 0.1686754864871531 |
| 0.4659297856409239 | 0.0071491802707371 | 0.2475033109787645 |
| 0.1205007581415742 | 0.2021798531029546 | 0.2929141263608557 |
| 0.8518089320642019 | 0.8417862503184352 | 0.2119816277611406 |
| 0.5808347260271347 | 0.5070493764447335 | 0.1340822961174126 |
| 0.0473897898776130 | 0.8254549706443655 | 0.9795410039866681 |
| 0.3133618138099195 | 0.1669652465675071 | 0.0570147035914985 |
| 0.7825859493151057 | 0.4828107649220712 | 0.9021014901520843 |
| 0.5151012072056602 | 0.1449770716437939 | 0.8248896891630935 |
| 0.2486089783069900 | 0.8088005842832686 | 0.7437971040492073 |
| 0.4278007989897077 | 0.7626033947003350 | 0.3009513895233056 |
| 0.1591596855515149 | 0.4201064230689298 | 0.2260984962900849 |
| 0.8944199337678853 | 0.0750589767745424 | 0.1488347931171177 |
| 0.6284219755252209 | 0.7357693493854853 | 0.0708671514322603 |
| 0.3630394661862439 | 0.3938969664967900 | 0.9934024765440839 |
| 0.0982036274501326 | 0.0515014454625486 | 0.9159999505672971 |
| 0.8310328567890934 | 0.7123186513553534 | 0.8382124861090574 |
| 0.5658866509479452 | 0.3740719127072012 | 0.7644119839400432 |
| 0.0476739834112578 | 0.7968443378461600 | 0.2782921226390656 |
| 0.7908409447449429 | 0.4440834812518943 | 0.1964843599269912 |
| 0.5234752533193614 | 0.1071270584196071 | 0.1183629892682845 |
| 0.2577805211359774 | 0.7652835991832347 | 0.0410322375570118 |
| 0.9928342255742351 | 0.4235079945520326 | 0.9634927514836917 |
| 0.7267342970383055 | 0.0815289286588197 | 0.8861935845905933 |
| 0.4604214477072972 | 0.7475193080052094 | 0.8078720716017429 |
| 0.1928798298605514 | 0.3973652922604458 | 0.7237269747090238 |
| 0.3931830509626835 | 0.4024872931806485 | 0.2936195189004067 |
| 0.1334627522457481 | 0.0412745329643229 | 0.2196234730172648 |
| 0.8671064912045097 | 0.6952834285547880 | 0.1404901064692581 |

|                    |                    |                    |
|--------------------|--------------------|--------------------|
| 0.6023372297964755 | 0.3549146845735294 | 0.0632169553786071 |
| 0.0694839240982716 | 0.6723121609086462 | 0.9080869750081604 |
| 0.3362618055520628 | 0.0134059400556694 | 0.9856292215510791 |
| 0.8033787798119789 | 0.3333501275576083 | 0.8313243944596849 |
| 0.5340723186376906 | 0.9928484883403002 | 0.7524968963035477 |
| 0.8836199950753993 | 0.5266757145989800 | 0.7227178194002448 |
| 0.1421100867767322 | 0.8714809512538366 | 0.7976325589611122 |
| 0.4118296659881509 | 0.2082412978357695 | 0.8774505905469425 |
| 0.6766529576755929 | 0.5512734394234116 | 0.9547689889752959 |
| 0.9432228007054988 | 0.8919147545718360 | 0.0321534414070115 |
| 0.2095078352309940 | 0.2350079984975721 | 0.1098350925599618 |
| 0.4780150375489995 | 0.5653615310482110 | 0.1846324925242016 |
| 0.7584195652610859 | 0.8915609967221556 | 0.2612674590432604 |
| 0.1163789751608348 | 0.4733229666753971 | 0.2772820609638558 |
| 0.8578892118302974 | 0.1285176314258507 | 0.2023675951315198 |
| 0.5881694948490352 | 0.7917601325339305 | 0.1225494773440587 |
| 0.3233472320193655 | 0.4487277200467830 | 0.0452310668351998 |
| 0.0567777519304116 | 0.1080859682192923 | 0.9678466402327146 |
| 0.7904923292032606 | 0.7649940456078497 | 0.8901648808311222 |
| 0.5219845615070611 | 0.4346398124221622 | 0.8153674042180654 |
| 0.2415816600469967 | 0.1084370798867837 | 0.7387323553947809 |
| 0.4180342985431409 | 0.5197872983753768 | 0.7258884279054953 |
| 0.9009473681146645 | 0.2130830221073197 | 0.8785055049267072 |
| 0.6346416684882215 | 0.8827903489344848 | 0.7995336672487099 |
| 0.1671996505521705 | 0.5560253966418145 | 0.9559606703396497 |
| 0.4321387981794373 | 0.8975504753584715 | 0.0335079046372684 |
| 0.7019256809046439 | 0.2341165782023253 | 0.1110204521650218 |
| 0.9695544810582106 | 0.5679899652016971 | 0.1873504269499335 |
| 0.2227272512598049 | 0.9416974423462676 | 0.2711598749938702 |
| 0.5819649461071350 | 0.4802111383845258 | 0.2741113867083627 |
| 0.0990527933768917 | 0.7869188781961469 | 0.1214946397776373 |
| 0.3653593323248217 | 0.1172090596752966 | 0.2004666262774606 |
| 0.8328004296942098 | 0.4439753173905956 | 0.0440393954028906 |
| 0.5678619790322657 | 0.1024504353099047 | 0.9664922171510355 |
| 0.2980744595516356 | 0.7658838478113452 | 0.8889795761589596 |
| 0.0304459019372132 | 0.4320072505460075 | 0.8126492602828250 |
| 0.7772735492481075 | 0.0583024274631256 | 0.7288398566196719 |
